# Supplementary material for: Synthesis and characterization of perovskite PbTiO3 nanoparticles with solution processability
Source: Royal Society of Chemistry journal article supplement (doi:10.1039/c0jm00270d), 2010-01-01
Supplement: c0jm00270d.pdf [file c0jm00270d.pdf]

## Supporting Information

### **Synthesis and Characterization of Perovskite PbTiO<sub>3</sub> Nanoparticles with Solution Processability**

Jun Wang, Xinchang Pang, Mufit Akinc, and Zhiqun Lin\*

Department of Materials Science and Engineering, Iowa State University, Ames, IA  
50011

E-mail: [zqlin@iastate.edu](mailto:zqlin@iastate.edu)

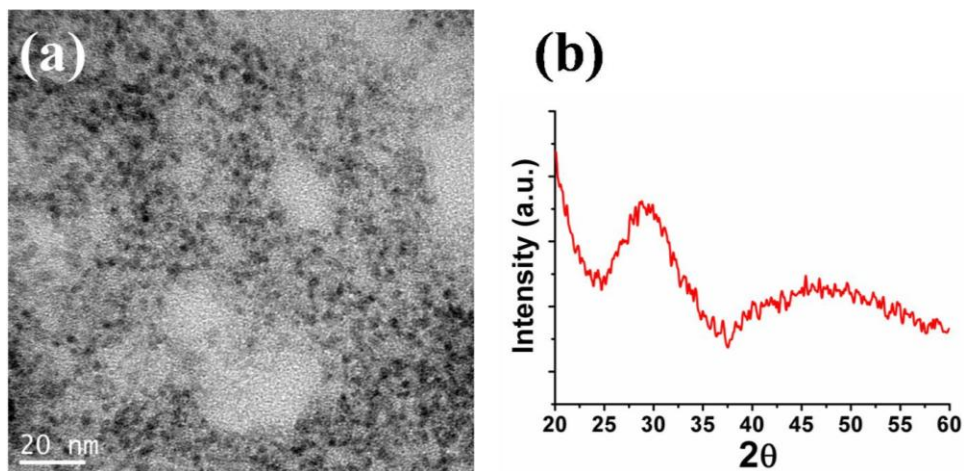

**Fig. S1** Characterization of PbTiO<sub>3</sub> nanoparticles obtained after heating at 200 °C for 48 hr with the presence of oleic acid. (a) TEM image; and (b) XRD pattern.

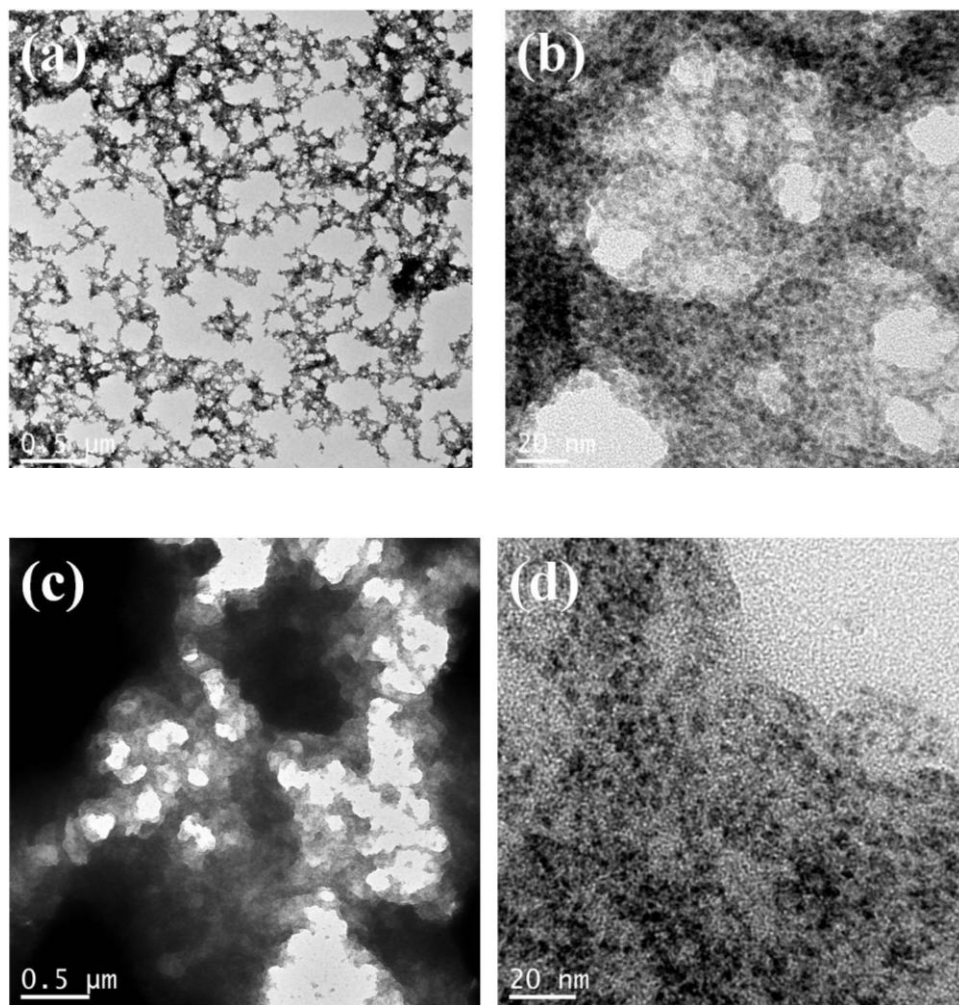

**Fig. S2** TEM images of  $\text{PbTiO}_3$  nanoparticles obtained after heating at  $200^\circ\text{C}$  for 2 hr *without* the addition of oleic acid. (a) and (b): nanoparticles aggregated in ethanol; (c) and (d): nanoparticles aggregated in toluene.

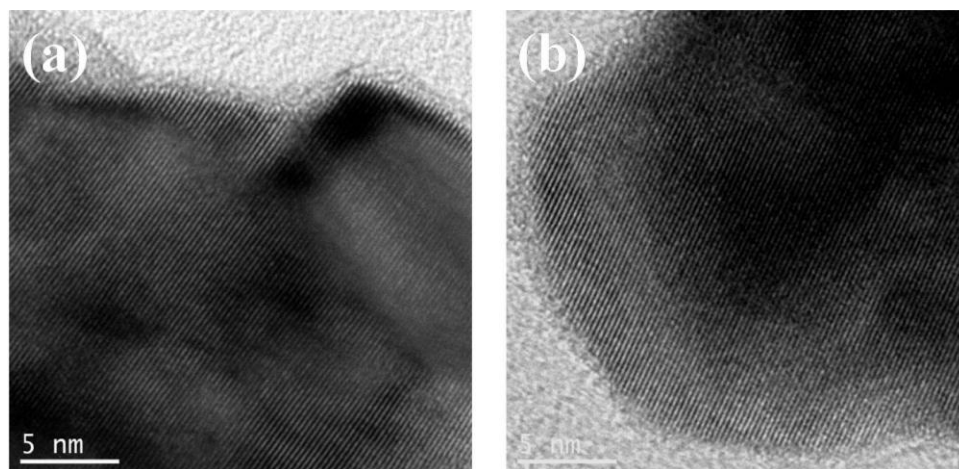

**Fig. S3** High resolution TEM images of  $\text{PbTiO}_3$  nanoparticles annealed at  $500^\circ\text{C}$  for 10 min. (a) particles obtained after heating at  $200^\circ\text{C}$  for 2 hr *with* the oleic acid utilized as surface capping ligand; (b) particles obtained after heating at  $200^\circ\text{C}$  for 2 hr *without* the addition of oleic acid. To prepare samples for TEM characterization, annealed  $\text{PbTiO}_3$  nanoparticles were dispersed in ethanol by ultrasonication, followed by drop casting the suspension on carbon coated copper TEM grid and allowed to dry in air.

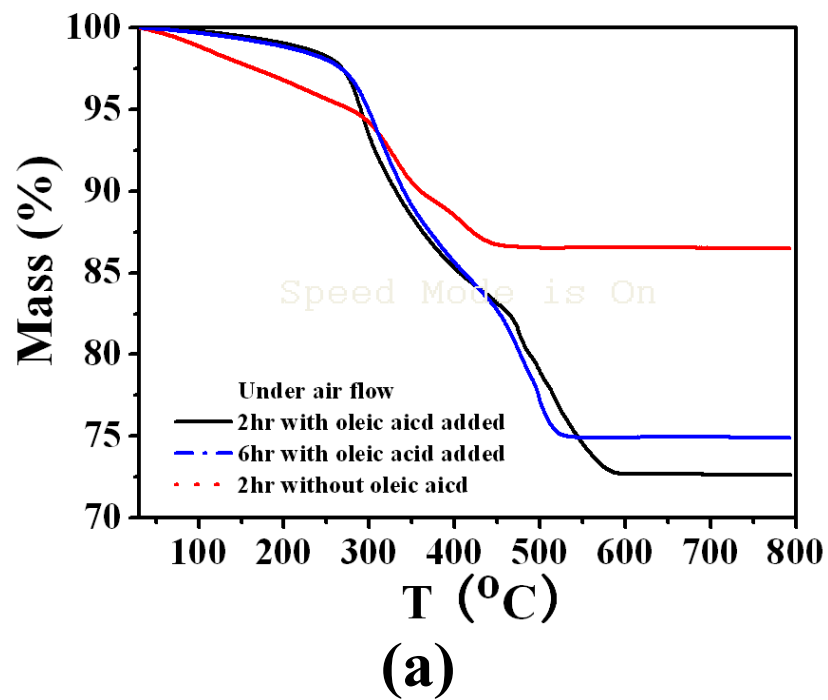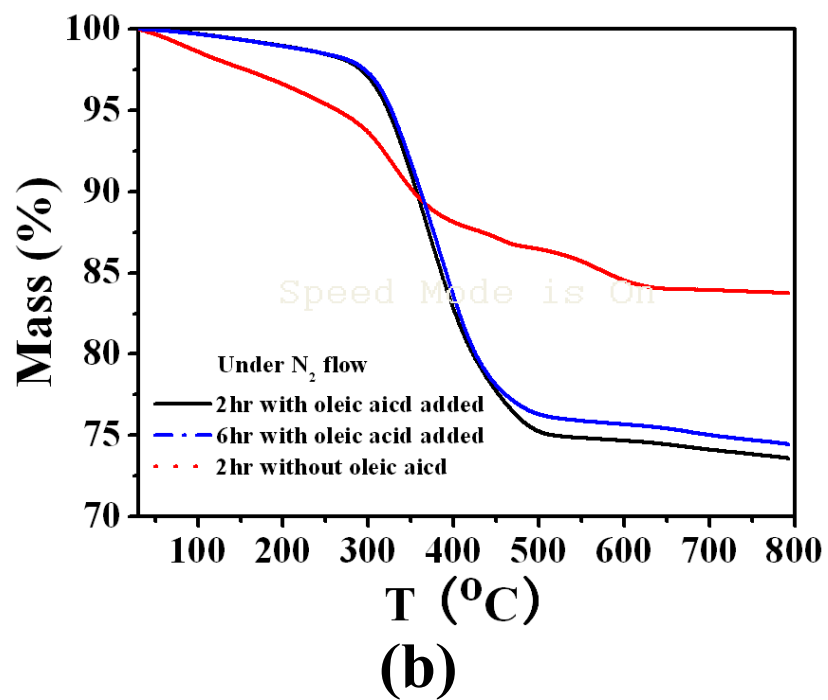

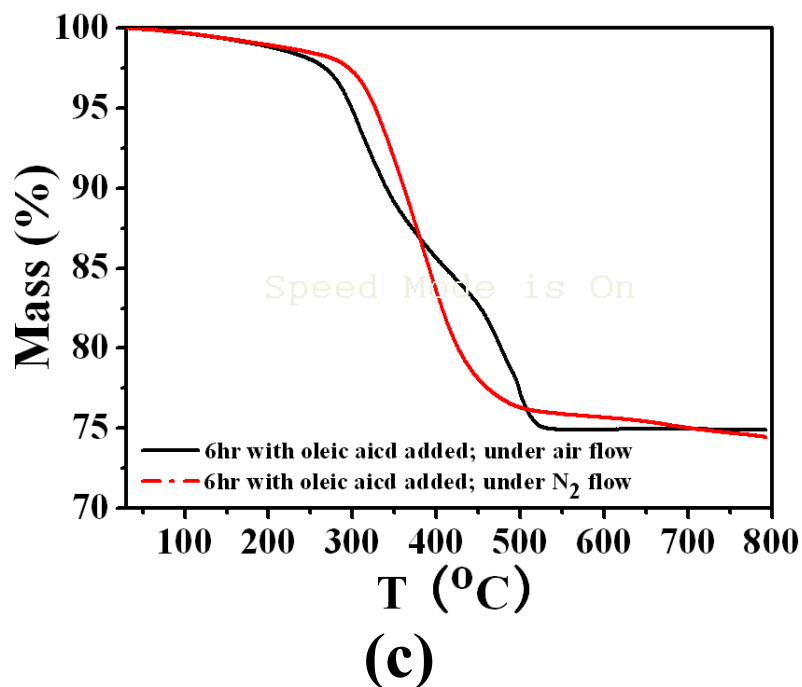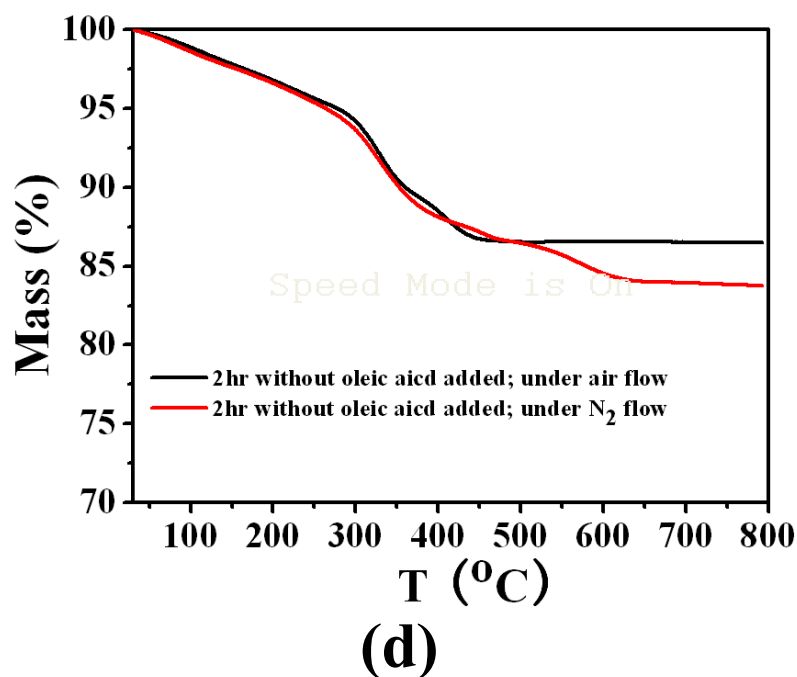

**Fig. S4** TGA measurements on fresh PbTiO<sub>3</sub> nanoparticles under air flow (back curve) and N<sub>2</sub> flow (red curve). (a) TGA curves of particles under air flow; (b) TGA curves of particles under N<sub>2</sub> flow; (c) TGA curves of particles obtained after heating at 200°C for 6 hr *with* the oleic acid used as surface capping ligand; and (d) TGA curves of particles obtained after heating at 200°C for 2 hr *without* the addition of oleic acid.
